# Supplementary material for: Advances in CALIPSO (IIR) cirrus cloud property retrievals – Part 2: Global estimates of the fraction of cirrus clouds affected by homogeneous ice nucleation
Source: Copernicus journal article supplement (doi:10.5194/egusphere-2024-3814), 2024-12-12
Supplement: Supplementary file 1 [file egusphere-2024-3814-supplement.pdf]

# **Advances in CALIPSO (IIR) cirrus cloud property retrievals – Part 2: Global estimates of the fraction of cirrus clouds affected by homogeneous ice nucleation**

David L. Mitchell<sup>1</sup> and Anne Garnier<sup>2</sup>

<sup>1</sup> Desert Research Institute, Reno, NV 89512-1095, USA

<sup>2</sup>[RSES]Analytical Mechanics Associates, Hampton, VA 23666, USA

*Correspondence to:* David L. Mitchell (David.Mitchell@dri.edu)

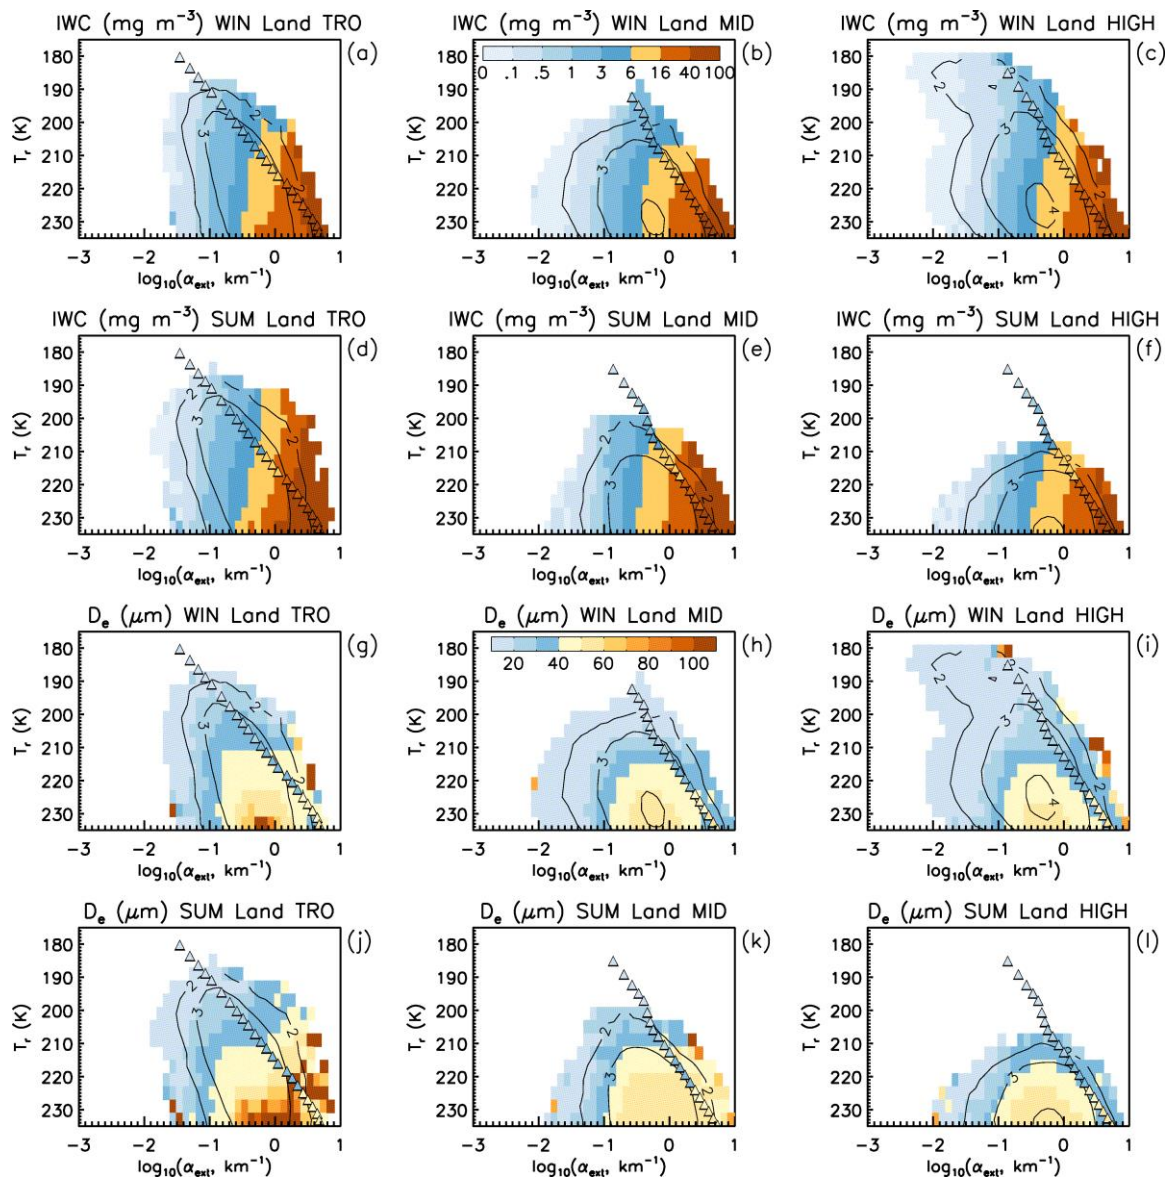

Figure S1. Same as Fig. 13 but over land, with  $\tau$  ranging from  $\sim 0.3$  to  $\sim 3$ . Only the predictions from simple hom theory using Eq. (4) are shown (triangles).

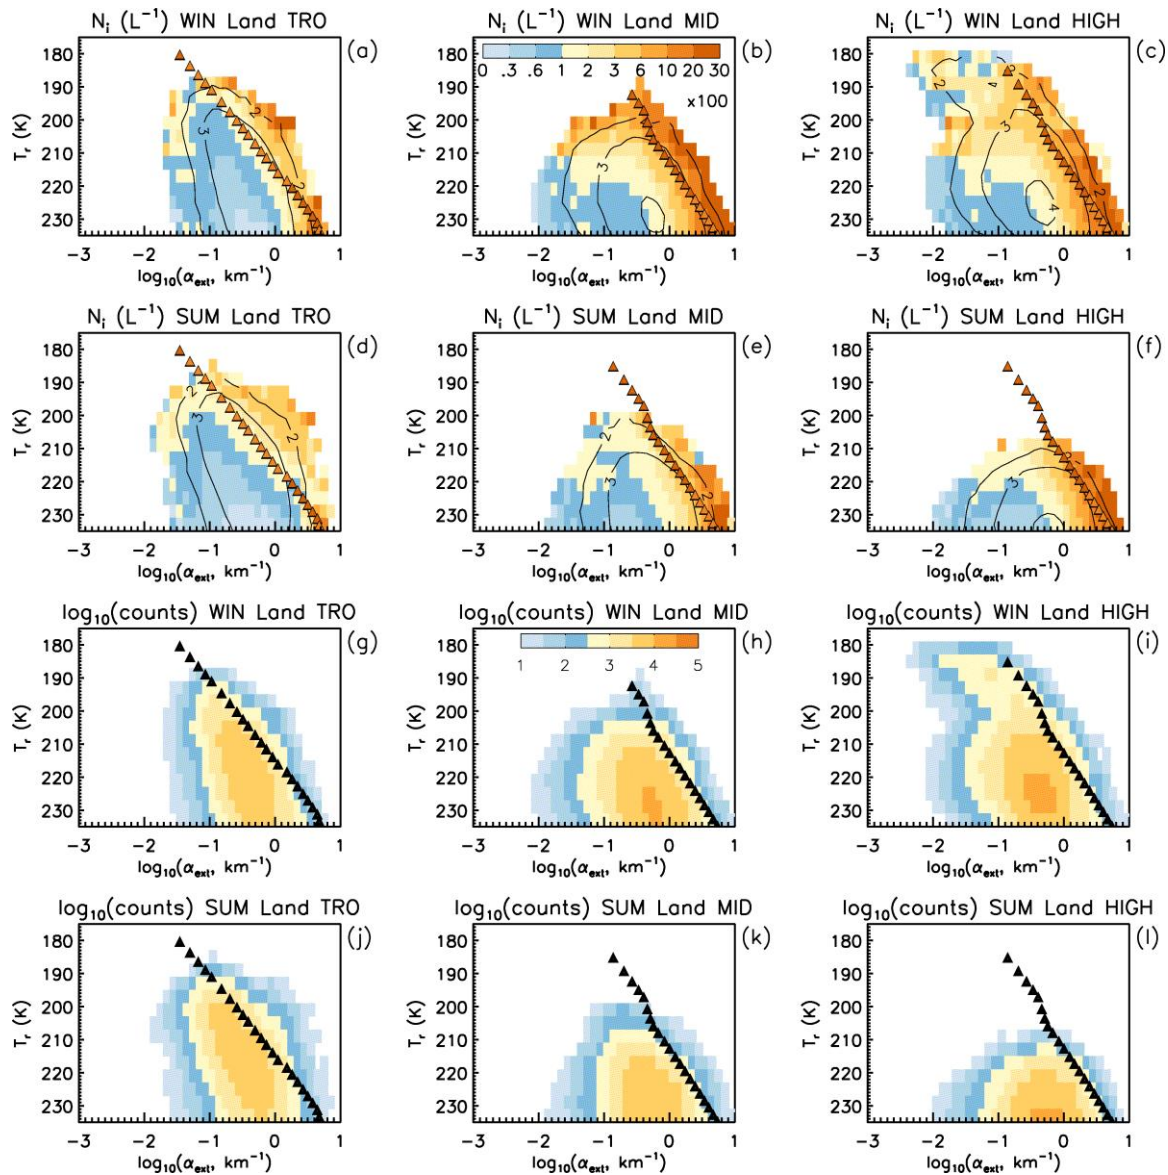

Figure S2. Same as Fig. 14 but over land, with  $\tau$  ranging from  $\sim 0.3$  to  $\sim 3$ . Predictions from simple hom theory are shown using Eqs. (4) and (5) for triangle position (using  $IWC_{\text{hom}}$  and  $D_{e,\text{hom}}$  for  $\alpha_{\text{ext}}$ ) and magnitude (for  $N_{\text{max}}$ ), respectively.

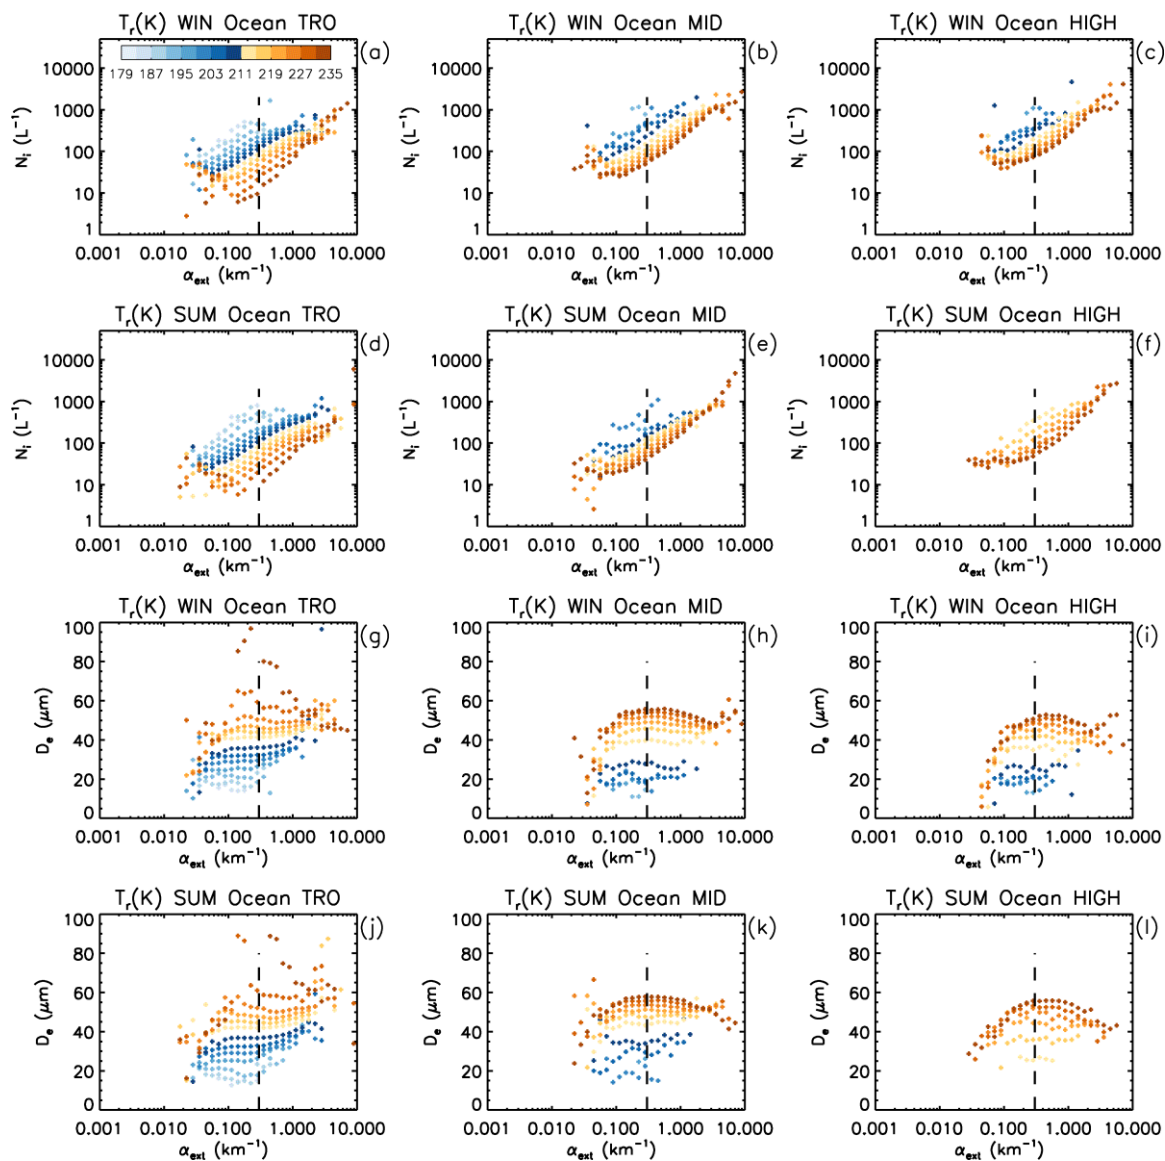

Figure S3. Same as Fig. 15 but with  $\tau$  ranging from  $\sim 0.3$  to  $\sim 3$ .

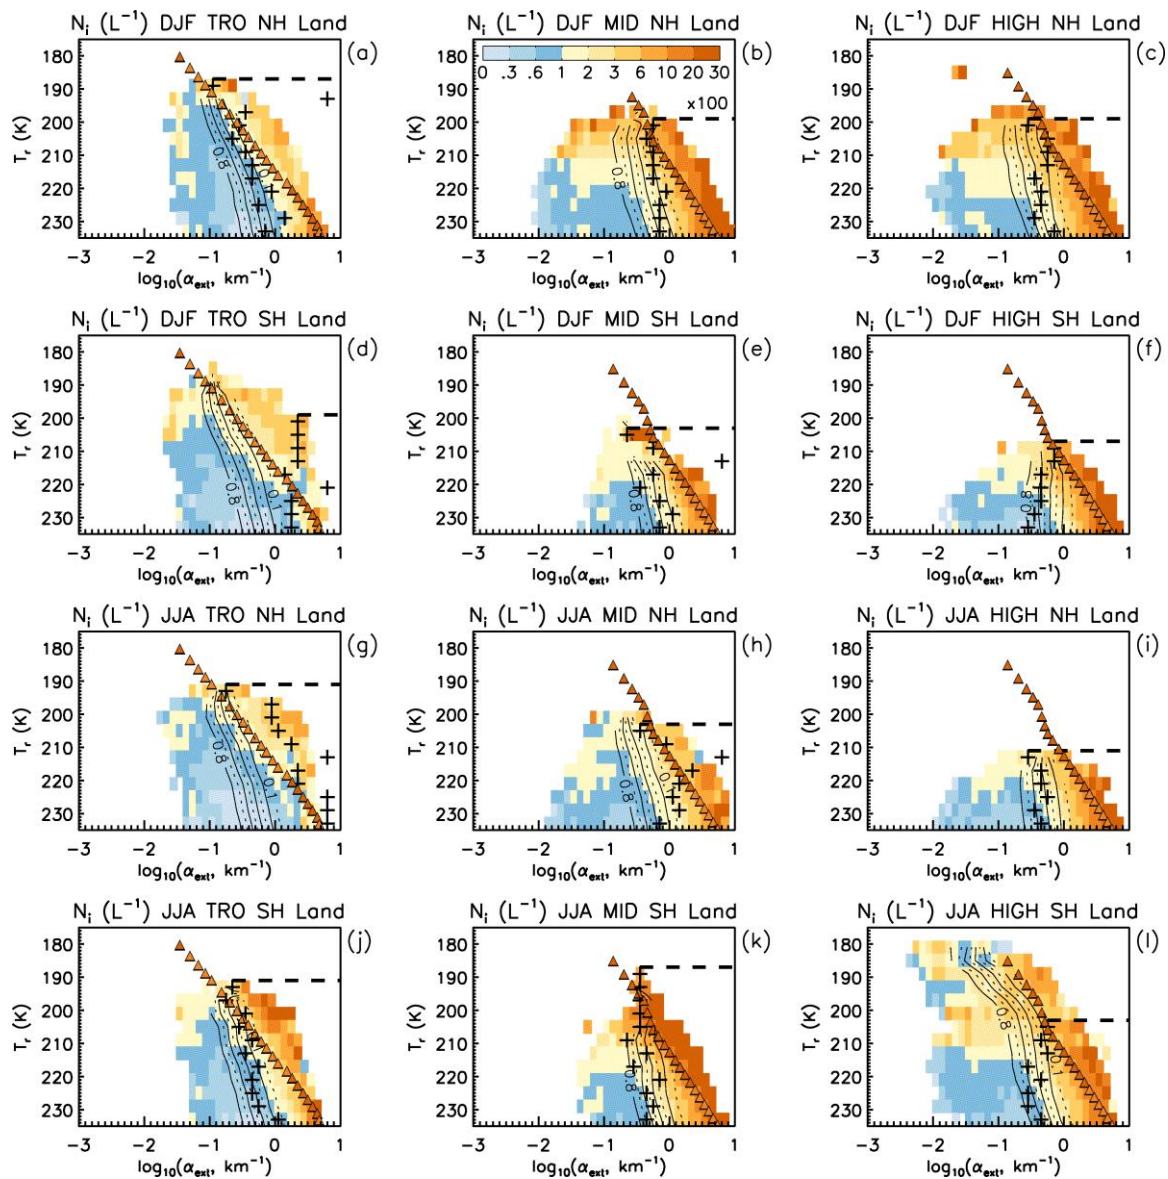

Figure S4. Same as Fig. 17 but over land with  $\tau$  ranging from  $\sim 0.3$  to  $\sim 3$ .
